# Supplementary material for: Electrons and phonons of the discharge products in the lithium–oxygen and lithium–sulfur batteries from first-principles calculations
Source: Royal Society of Chemistry journal article supplement (doi:10.1039/d3cp00106g), 2023-01-01
Supplement: d3cp00106g1.pdf [file d3cp00106g1.pdf]

From the equation (1) and (2)<sup>[10]</sup>, the formation energy is  $\Delta E$ , the total energy of solid Li is  $E_{Li}(s)$ , of gas state  $O_2$  is  $E_{O_2}(g)$ , of rhombic sulfur is  $E_{S_6}(s)$ , the calculated theoretical and experimental data are listed in table S1. The formation energy for  $Li_2O_2$ ,  $LiO_2$  is lower than the previous work due to temperature effect to a certain extent. The low formation energy of  $Li_2S$  indicates that  $Li_2S$  is easily reproduced during the discharge process.

$$\Delta E = E_{Li_xO_y}(s) - xE_{Li}(s) - \frac{y}{2}E_{O_2}(g) \quad (1)$$

$$\Delta E = E_{Li_2S}(s) - 2E_{Li}(s) - \frac{1}{6}E_{S_6}(g) \quad (2)$$

Table S1 Predicted standard formation energy and total energies at zero temperature and their comparisons with available experimental and theoretical data at 298.15K

|                                 | Li     | O <sub>2</sub> | S <sub>6</sub> | Li <sub>4</sub> O <sub>4</sub>                               | LiO <sub>2</sub>                                            | Li <sub>2</sub> S |
|---------------------------------|--------|----------------|----------------|--------------------------------------------------------------|-------------------------------------------------------------|-------------------|
| Total energy                    | -194.8 | -867.52        | -1823.86       | -2532.59                                                     | -1063.76                                                    | -700.17           |
| Formation energy ( $\Delta E$ ) |        |                |                | -9.175<br>(-6.569 <sup>[10]</sup> , -6.557 <sup>[S1]</sup> ) | -1.44<br>(-3.272 <sup>[10]</sup> , -2.689 <sup>[S2]</sup> ) | -6.59             |

\*The Computational methods of Li, O<sub>2</sub>, S<sub>6</sub> are consistent with Li<sub>2</sub>O<sub>2</sub>, LiO<sub>2</sub>, and Li<sub>2</sub>S.

Table S2 Predicted bandgaps and their comparisons with available theoretical data

| Method type         | Bandgaps (eV)                  |                      |
|---------------------|--------------------------------|----------------------|
|                     | Li <sub>2</sub> O <sub>2</sub> | Li <sub>2</sub> S    |
| GGA-PBE             | 1.894                          | 3.398                |
| GGA-WC              | 1.934                          | 3.212                |
| HES06               | 5.040                          | 4.069                |
| GGA-RPBE(PBE)       | 1.88(1.99) <sup>[23,24]</sup>  |                      |
| GGA-PBE, and vdW-DF |                                | 3.46 <sup>[25]</sup> |

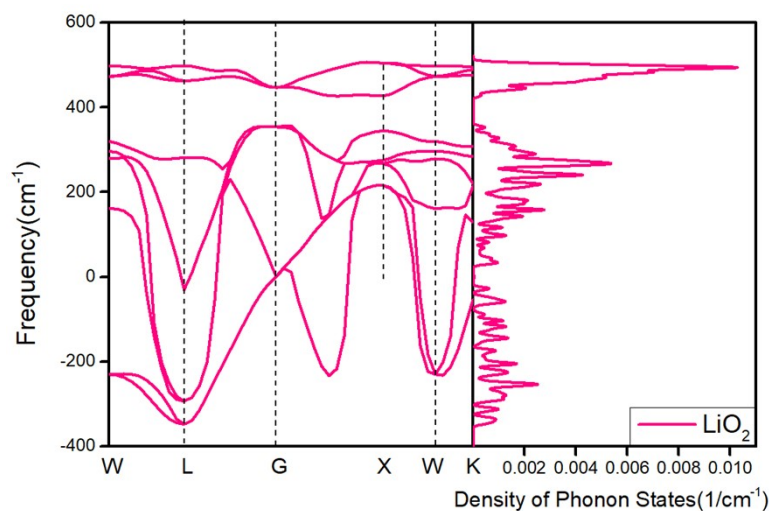

Fig. S1 The phonon dispersion of the LiO<sub>2</sub>

References:

S1 Chase, M.W. NIST-JANAF Thermochemical Tables, JANAF 4th Ed., Washington D.C.: ACS, AIP, NIST, 1998.

S2 D'Orazio, L.A., Wood, R.H. Thermodynamics of the higher oxides. I, J. Phys. Chem. 1965, 69, 2550-2557
